# Supplementary material
Source: PubMed Central journal article supplement (PMC10880442)

|          |        |         |         |        |         |           |         |           |          |          |            |       |
|----------|--------|---------|---------|--------|---------|-----------|---------|-----------|----------|----------|------------|-------|
| PTAU_bi  |        |         |         | -0.36  | -0.3    | -0.33     | -0.34   | -0.49     |          |          | 0.36       | 0.42  |
| TAU_bi   |        |         |         | -0.34  | -0.31   | -0.3      | -0.33   | -0.47     |          |          | 0.36       | 0.4   |
| YWHAZ    | 0.8    | 0.79    | 0.42    | -0.34  | -0.28   | -0.31     | -0.35   | -0.41     | -0.2     |          | 0.34       | 0.36  |
| YWHAB    | 0.79   | 0.77    | 0.39    | -0.3   | -0.26   | -0.27     | -0.33   | -0.36     | -0.16    |          | 0.32       | 0.34  |
| SMOC1    | 0.77   | 0.77    | 0.44    | -0.23  | -0.14   | -0.22     | -0.23   | -0.29     | -0.22    |          | 0.24       | 0.2   |
| SPP1     | 0.59   | 0.58    | 0.26    | -0.15  |         |           | -0.18   | -0.21     |          |          | 0.18       | 0.21  |
| ENO1     | 0.66   | 0.64    | 0.26    | -0.15  | -0.16   |           | -0.19   | -0.25     |          |          | 0.18       | 0.23  |
| CHI3L1   | 0.56   | 0.53    | 0.24    | -0.14  | -0.23   |           | -0.17   | -0.21     |          |          | 0.17       | 0.21  |
| MDH1     | 0.76   | 0.7     | 0.23    | -0.15  | -0.15   |           | -0.18   | -0.23     |          |          | 0.16       | 0.17  |
| PPIA     | 0.57   | 0.55    | 0.23    | -0.17  | -0.13   |           | -0.18   | -0.25     |          |          | 0.16       | 0.21  |
| PKM      | 0.84   | 0.81    | 0.26    | -0.13  | -0.14   |           | -0.16   | -0.27     |          |          | 0.15       | 0.21  |
| PEBP1    | 0.75   | 0.71    | 0.23    | -0.15  | -0.15   |           | -0.19   | -0.22     | 0.15     |          | 0.14       | 0.19  |
| PKM2     | 0.84   | 0.8     | 0.25    | -0.13  |         |           | -0.16   | -0.24     |          |          | 0.13       | 0.16  |
| CALM2    | 0.79   | 0.75    | 0.24    | -0.11  |         |           | -0.13   | -0.24     |          |          | 0.12       | 0.16  |
| LDHC     | 0.63   | 0.59    | 0.17    | -0.12  |         |           | -0.13   | -0.17     |          |          | 0.12       |       |
| CD44     | 0.52   | 0.48    | 0.18    | -0.14  | -0.18   |           | -0.17   | -0.23     |          |          | 0.11       | 0.24  |
| DDAH1    | 0.71   | 0.68    | 0.22    |        |         |           |         | -0.27     |          |          | 0.11       | 0.18  |
| ALDOA    | 0.82   | 0.77    | 0.23    |        |         |           | -0.13   | -0.23     |          |          |            | 0.17  |
| GMFB     | 0.68   | 0.63    | 0.2     |        |         |           | -0.15   | -0.2      |          |          |            | 0.15  |
| C9       |        |         |         | -0.12  |         |           | -0.14   |           |          |          |            | 0.14  |
| PARK7    | 0.69   | 0.65    | 0.16    |        |         |           | -0.14   | -0.18     | 0.12     |          |            | 0.14  |
| GDA      | 0.75   | 0.72    | 0.23    |        |         |           |         | -0.2      |          |          |            | 0.15  |
| LDHB     | 0.72   | 0.68    | 0.17    |        |         |           | -0.11   | -0.18     | 0.13     |          |            |       |
| GOT1     | 0.77   | 0.73    | 0.19    |        |         |           |         | -0.2      | 0.14     |          |            |       |
| GSN      | 0.35   | 0.32    |         |        |         |           | -0.11   | -0.14     |          |          |            |       |
| PGLYRP2  |        |         |         |        |         |           |         |           |          |          |            |       |
| PTPRZ1   | 0.61   | 0.57    | 0.14    |        |         |           |         |           | 0.21     |          |            |       |
| GAPDH    | 0.39   | 0.36    |         |        |         |           |         |           | 0.13     |          |            |       |
| CP       |        |         |         |        |         |           |         |           |          |          |            |       |
| TPI1     | 0.58   | 0.54    | 0.13    |        |         |           |         |           | 0.17     |          |            |       |
| ALB      |        |         |         |        |         |           |         |           |          |          |            |       |
| KNG1     |        |         |         |        |         |           |         |           |          |          |            |       |
| APOC1    |        |         |         |        |         |           |         |           |          |          |            |       |
| PON1     |        |         |         |        |         |           |         |           |          |          |            |       |
| APOA4    |        |         |         |        |         |           |         |           |          |          |            |       |
| SOD1     | 0.68   | 0.65    | 0.17    |        |         |           |         | -0.16     | 0.13     |          |            |       |
| NCAM1    | 0.61   | 0.56    |         |        |         |           |         |           | 0.24     |          |            |       |
| OGN      | 0.26   | 0.23    |         |        |         |           |         |           | 0.13     |          |            |       |
| APOE     | 0.58   | 0.54    |         |        |         |           |         | -0.15     | 0.21     |          |            |       |
| F2       |        |         |         |        |         |           |         |           |          |          |            |       |
| APOC2    |        |         |         |        |         |           |         |           |          |          |            |       |
| DKK3     | 0.64   | 0.59    |         |        |         |           |         |           | 0.24     |          |            |       |
| NRXN1    | 0.64   | 0.59    |         |        |         |           |         |           | 0.26     |          |            |       |
| HBB      |        |         |         |        |         |           |         |           |          |          |            |       |
| HBA      |        |         |         |        |         |           |         |           |          |          |            |       |
| OMG      | 0.47   | 0.43    |         | 0.14   | 0.12    |           |         |           | 0.25     |          |            |       |
| SCG2     | 0.52   | 0.47    |         | 0.2    | 0.14    |           | 0.14    |           | 0.36     | -0.15    |            |       |
| VEGF     | 0.51   | 0.45    |         | 0.24   | 0.13    |           | 0.16    |           | 0.41     | -0.17    |            |       |
| NPTXR    | 0.52   | 0.47    |         | 0.26   | 0.22    |           | 0.19    |           | 0.41     | -0.2     |            |       |
| NPTX2    | 0.31   | 0.27    | -0.14   | 0.32   | 0.28    |           | 0.26    |           | 0.41     | -0.23    | -0.14      |       |
| ABETA_bi |        |         |         | 0.43   | 0.35    | 0.36      | 0.39    | 0.34      |          |          | -0.4       | -0.35 |
|          | TAU_bi | PTAU_bi | AV45_bi | FDG_bi | HIPP_bi | HIPP_traj | MOCA_bi | MOCA_traj | ABETA_bi | CDRSB_bi | CDRSB_traj |       |

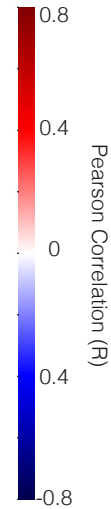

Supplement: NIHMS1945153-supplement-Supplementary_Figure_1.pdf [file NIHMS1945153-supplement-Supplementary_Figure_1.pdf]
