# Supplementary material
Source: PubMed Central journal article supplement (PMC10880442)

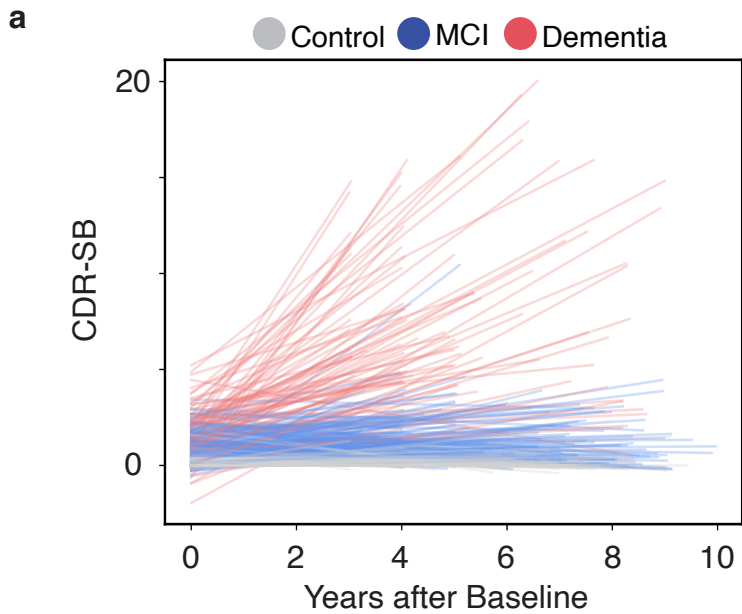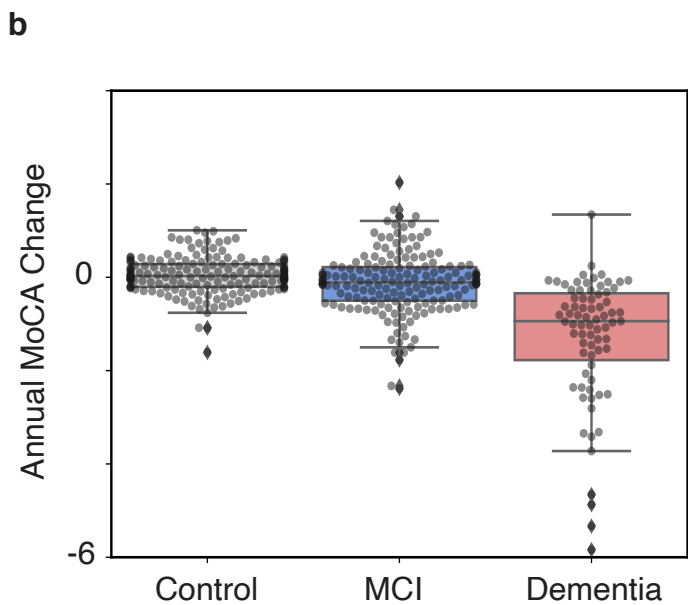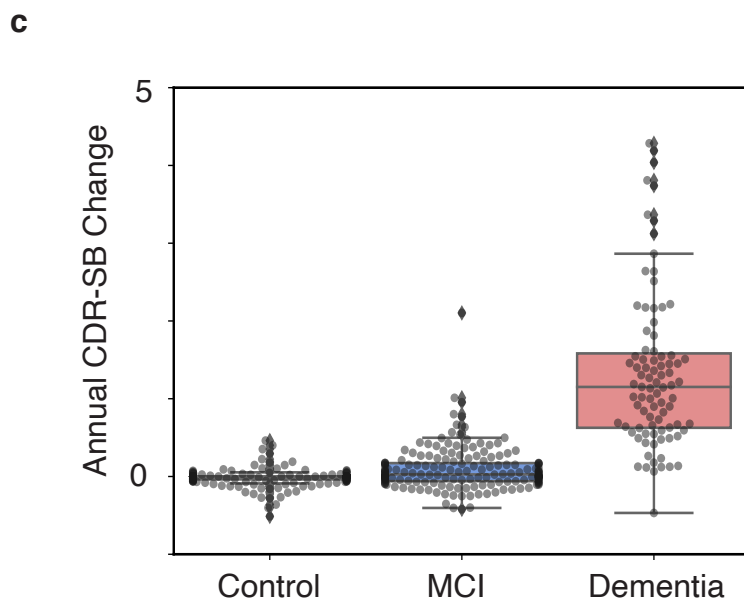

Supplement: NIHMS1945153-supplement-Supplementary_Figure_2.pdf [file NIHMS1945153-supplement-Supplementary_Figure_2.pdf]
